# Supplementary material
Source: Springer Nature journal article supplement (https://www.springermedizin.de/resource/supplementary/13069_2012_105_MOESM2_ESM.pdf/9659744)

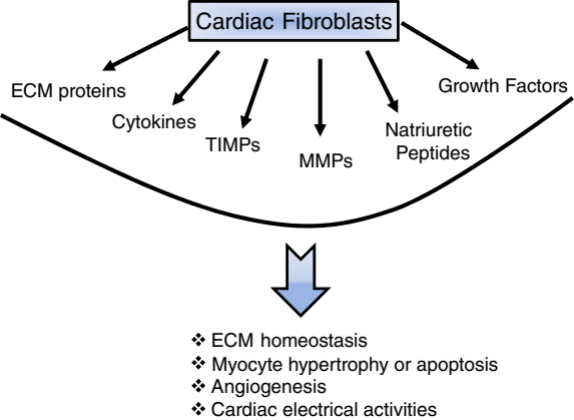

Supplement: MOESM2 [file 9659744]
